# Supplementary material
Source: Springer Nature journal article supplement (https://www.springermedizin.de/resource/supplementary/13256_2013_2726_MOESM5_ESM.pdf/9651274)
Supplement: MOESM5 [file 9651274]

Vitamin D

25-hydroxylase

25 hydroxy-vitamin D

1 $\alpha$ -hydroxylase

1,25 dihydroxy-vitamin D

24-hydroxylase

1,24,25 tri  
hydroxy  
vitamin D

VDR

RXR

Calcitropic effects  
Antineoplastic effects  
Immunomodulatory effects
